# Supplementary material
Source: publisher figshare collection journal article supplement (https://acs.figshare.com/ndownloader/files/4615861)
Supplement: Supplementary file 1 [file 4615861]

# Supporting information

## Sorption behaviour of psycho-active drugs onto sediment

Karoline Stein<sup>1</sup>, Maria Ramil<sup>1</sup>, Guido Fink<sup>1</sup>, Michael Sander<sup>2</sup>, and Thomas A. Ternes<sup>1\*</sup>

<sup>1</sup>: German Federal Institute of Hydrology (BfG), D-56068 Koblenz, Am Mainzer Tor 1, Germany, [ternes@bafg.de](mailto:ternes@bafg.de)

<sup>2</sup>: Institute of Biogeochemistry and Pollutant Dynamics (IMP), Swiss Federal Institute of Technology Zurich (ETHZ), Universitätstrasse 16, CH-8092 Zurich, Switzerland

\* Corresponding author: Thomas Ternes, phone: +49 261-1306 5560; fax: +49 261-1306 5363;  
e-mail: [Ternes@bafg.de](mailto:Ternes@bafg.de)

### Content

|                                                                                   |     |
|-----------------------------------------------------------------------------------|-----|
| Supporting information .....                                                      | S1  |
| Sorption behaviour of psycho-active drugs onto sediment .....                     | S1  |
| 1 Sediment sampling .....                                                         | S2  |
| 2 Texture and organic carbon content of the examined sediments .....              | S3  |
| 3 Detailed description of the analytical procedures .....                         | S3  |
| 3.1 Reference material and standards .....                                        | S3  |
| 3.2 Detailed description of the solid phase extraction (SPE) .....                | S3  |
| 3.3 Detailed description of the chromatographic LC and tandem MS conditions ..... | S3  |
| 3.4 Operating conditions of the LC and tandem MS .....                            | S5  |
| 3.5 Calibration .....                                                             | S6  |
| 4 Environmental relevance .....                                                   | S7  |
| 5 Sorption kinetics .....                                                         | S8  |
| Literature cited .....                                                            | S15 |

Pages: 15      Tables: 6      Figures: 14

### Tables

|            |                                                                                                                                    |     |
|------------|------------------------------------------------------------------------------------------------------------------------------------|-----|
| Table S 1. | Texture and organic carbon content of the examined sediments .....                                                                 | S3  |
| Table S 2. | Composition and properties of groundwater used for the experiments .....                                                           | S4  |
| Table S 3. | Precursor, product ions and retention times used in LC tandem MS detection .....                                                   | S5  |
| Table S 4. | Quadratic calibration parameters .....                                                                                             | S7  |
| Table S 5. | Total mass balance in % (w/w) of the test substances for the sorption and desorption test period in both sediments after 24h ..... | S8  |
| Table S 6. | Calculated thermodynamic indices of irreversibility, TII for sorption-desorption data on Burgen and Dausenau sediments. ....       | S14 |

### Figures

|             |                                                                                                                                            |     |
|-------------|--------------------------------------------------------------------------------------------------------------------------------------------|-----|
| Figure S 1. | Sediment sampling locations .....                                                                                                          | S2  |
| Figure S 2. | Chromatogram (reference sediment spiked with 200 ng analyte) .....                                                                         | S6  |
| Figure S 3. | Ion suppression in three different river sediments .....                                                                                   | S6  |
| Figure S 4. | Concentrations of carbamazepine and sulfamethoxazole in natural river sediments .....                                                      | S8  |
| Figure S 5. | Adsorption kinetics of carbamazepine in different sediments with (right) and without (left) addition of sodium azide .....                 | S9  |
| Figure S 6. | Adsorption kinetics of dihydrocarbamazepine in different sediments with (right) and without (left) addition of sodium azide .....          | S9  |
| Figure S 7. | Adsorption kinetics of dihydroxydihydrocarbamazepine in different sediments with (right) and without (left) addition of sodium azide ..... | S10 |
| Figure S 8. | Adsorption kinetics of diazepam in different sediments with (right) and without (left) addition of sodium azide .....                      | S10 |

|                                                                                                                                          |     |
|------------------------------------------------------------------------------------------------------------------------------------------|-----|
| Figure S 9. Adsorption kinetics of oxazepam in different sediments with (right) and without (left) addition of sodium azide .....        | S11 |
| Figure S 10. Adsorption kinetics of morphine in different sediments with (right) and without (left) addition of sodium azide .....       | S11 |
| Figure S 11. Adsorption kinetics of codeine in different sediments with (right) and without (left) addition of sodium azide .....        | S12 |
| Figure S 12. Adsorption kinetics of dihydrocodeine in different sediments with (right) and without (left) addition of sodium azide ..... | S12 |
| Figure S 13. Adsorption kinetics of tramadol in different sediments with (right) and without (left) addition of sodium azide .....       | S13 |
| Figure S 14. Adsorption kinetics of temazepam in different sediments with (right) and without (left) addition of sodium azide .....      | S13 |

## 1 Sediment sampling

River sediment samples were taken at 9 different sites in Western Germany (Burgen, Dausenau, Lippe, Emscher, Wupper, Landgraben, Bieber, Rodau, Schwarzbach). Locations are shown in Figure S1. Except for the sites Burgen und Dausenau sediment samples were randomly taken from the sediment surface of the stream by a grabbing device (van Veen) which takes a sample at depths up to 15 cm, depending on the sediment thickness. Sediment samples from the Burgen and Dausenau sites were taken manually by a shovel at depth up to 10 cm. They were air-dried and sieved < 2mm prior to batch experiments.

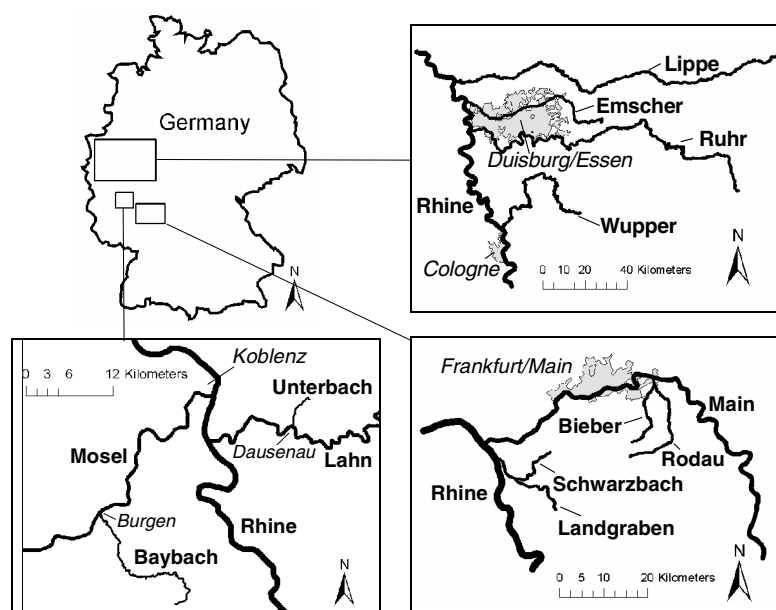

**Figure S 1. Sediment sampling locations**

## 2 Texture and organic carbon content of the examined sediments

Texture and organic carbon content of the solid matrices are summarized in Table S1.

**Table S 1. Texture and organic carbon content of the examined sediments**

| Sediment                                                  | Burgen          | Dause-<br>nau   | Lippe | Emscher | Wupper | Land-<br>graben | Bieber | Rodau | Schwarz-<br>bach | Schlau-<br>engraben | Murn | reference<br>sediment<br>(Rhine) |
|-----------------------------------------------------------|-----------------|-----------------|-------|---------|--------|-----------------|--------|-------|------------------|---------------------|------|----------------------------------|
| Texture [mass% of dry weight] (DIN 19683-2)               |                 |                 |       |         |        |                 |        |       |                  |                     |      |                                  |
| Sand                                                      | 90              | 53              | 76    | 63      | 21     | 42              | 68     | 75    | 71               | 51                  | 49   | 5                                |
| Clay + Silt                                               | 10 <sup>a</sup> | 47 <sup>b</sup> | 24    | 37      | 79     | 58              | 32     | 25    | 29               | 22                  | 78   | 95                               |
| Total organic<br>carbon (TOC)<br>[mass% of dry<br>weight] | 0.74            | 4.36            | 1.47  | 1.89    | 7.6    | 3.97            | 3.56   | 1.72  | 4.03             | 1.3                 | 3.2  | ---                              |

<sup>a</sup>: clay: 4%; <sup>b</sup>: clay: 18%

## 3 Detailed description of the analytical procedures

### 3.1 Reference material and standards

Carbamazepine (Sigma, Deisenhofen, Germany), 10,11-dihydrocarbamazepine (Alltech, USA), 10,11-dihydro-10,11-dihydroxycarbamazepine ( $\mu$ -Mol, Luckenwalde, Germany), diazepam, oxazepam, temazepam (Sigma, Deisenhofen, Germany), morphine as an ingredient of opium (Sigma-Aldrich, Steinheim, Germany), codeine, dihydrocodeine (Th. Geyer, Renningen, Germany), tramadol (Fluka, Buchs, Switzerland). We included sulfamethoxazole (Sigma, Deisenhofen, Germany) and its main metabolite N4-acetylsulfamethoxazole (EAWAG self-synthesis, Dübendorf, Switzerland) to allow referencing of the findings to previous work on the sorption of sulfonamides. Codeine-d<sub>6</sub>, diazepam-d<sub>5</sub>, morphine-d<sub>6</sub>, nordiazepam-d<sub>5</sub> (Cambridge Isotopes Lab., Saarbrücken, Germany), oxazepam-d<sub>6</sub> (Sigma, Deisenhofen, Germany), carbamazepine-<sup>13</sup>C<sup>15</sup>N (Campro Scientific, Berlin, Germany), sulfamethoxazole-d<sub>4</sub>, and N4-acetylsulfamethoxazole-d<sub>4</sub> (Toronto Research Chemicals, North York, ON, Canada)

### 3.2 Detailed description of the solid phase extraction (SPE)

SPE was carried out at neutral pH using OASIS HLB 200 (200 mg, Waters, Milfort, USA). The OASIS HLB 200 cartridges (200 mg, Waters, Milfort, USA) were conditioned with 1 x 2 mL n-heptane, followed by 1 x 2 mL acetone, 3 x 2 mL methanol and 4 x 2 mL groundwater (pH 7). The water samples were then passed through the pre-conditioned SPE-cartridges with a flow rate of approx. 20 mL/min. Subsequently, the solid phase material was dried completely by a nitrogen stream for one hour and the analytes were eluted four times with 2 mL acetone. The combined extracts were evaporated to about 100  $\mu$ L by a gentle nitrogen stream, then 100  $\mu$ L methanol was added and the extract was again evaporated to 100  $\mu$ L in order to remove most of the acetone. The remaining extract was filled up to 1 mL with 900  $\mu$ L Milli-Q-water. Finally, detection was performed via LC-electrospray tandem MS (HPLC: Agilent 1100 from Agilent Technologies, Waldbronn, Germany; API 4000, Applied Biosystems, Foster City, CA, USA) using a 150 x 3 mm Synergi 4  $\mu$ m Polar-RP 80 Å column (phenomenex®, Aschaffenburg, Germany).

### 3.3 Detailed description of the chromatographic LC and tandem MS conditions

The samples extracts (50  $\mu$ L) were injected into the LC system (Agilent 1100 with degasser, quaternary pump and autosampler, Agilent Technologies, Waldbronn, Germany) using acetonitrile (A) and 10 mM ammonium formate in water, adjusted to pH 4 with formic acid (B), as a mobile phase. The following gradient programme

was used: Start of the run with 10% A / 90% B, kept isocratic for 5 min, lineary increased to 80% A / 20% B within 13 min, returned to the initial conditions 10% A / 90% B within 2 min and kept isocratic for the last 10 min. During the analysis the flow rate was kept constant at 0.5 mL/min.

Table S 2. Composition and properties of groundwater used for the experiments

| Parameter                                                               | value  | unit            |
|-------------------------------------------------------------------------|--------|-----------------|
| Visual appearance                                                       | clear  |                 |
| Olfactory threshold                                                     | 1      | GSW             |
| colouration (absorptance Hg 436 nm)                                     | 0.49   | m <sup>-1</sup> |
| turbidity                                                               | 0.26   | TE/F            |
| Water temperature                                                       | 13.6   | °C              |
| Air temperature                                                         | 16.1   | °C              |
| conductivity                                                            | 513    | µS/cm           |
| Redox potential (Pt, Ag, AgCl)                                          | 207    | mV              |
| pH                                                                      | 6.87   |                 |
| pH after saturation with calcium carbonate                              | 7.14   |                 |
| Delta pH                                                                | -0.27  |                 |
| Calcite capacity                                                        | 53     | mg/L            |
| Dissolved oxygen                                                        | 2.5    | mg/L            |
| Oxygen saturation index                                                 | 25     | %               |
| Base capacity to pH 8.2                                                 | 1.88   | mmol/L          |
| As dissolved carbon dioxide                                             | 82.7   | mg/L            |
| acid capacity to pH 8.2                                                 | n.d.   |                 |
| acid capacity to pH 4.3                                                 | 4.47   | mmol/L          |
| Carbonate hardness                                                      | 12.5   | °dH             |
| Sum of alkaline earths                                                  | 2.6    | mmol/L          |
| Total hardness                                                          | 14.3   | °dH             |
| hardness (German Detergent Law)                                         | 3      |                 |
| Sodium                                                                  | 14.1   | mg/L            |
| Potassium                                                               | 4.95   | mg/L            |
| Calcium                                                                 | 77.9   | mg/L            |
| Magnesium                                                               | 15.0   | mg/L            |
| Iron (total)                                                            | 0.018  | mg/L            |
| Manganese                                                               | 0.045  | mg/L            |
| Aluminium                                                               | <0.005 | mg/L            |
| Ammonium                                                                | 0.09   | mg/L            |
| Nitrite                                                                 | <0.005 | mg/L            |
| Nitrate                                                                 | 1.43   | mg/L            |
| Chloride                                                                | 16.4   | mg/L            |
| Sulphate                                                                | 28.5   | mg/L            |
| Phosphor (PO <sub>4</sub> <sup>3-</sup> )                               | <0.04  | mg/L            |
| HCO <sub>3</sub> <sup>-</sup>                                           | 273    | mg/L            |
| Carbonate                                                               | n. d.  | mg/L            |
| Oxidation ability Mn VII>II calculated as O <sub>2</sub>                | 0.13   | mg/L            |
| Oxidation ability Mn VII>II calculated as KMnO <sub>4</sub> consumption | 0.51   | mg/L            |
| TOC                                                                     | 1.5    | mg/L            |

### 3.4 Operating conditions of the LC tandem MS

The tandem MS was operated in positive electrospray ionization mode and was run in multiple reaction monitoring mode (MRM). Operational parameters were: collision gas, 41 kPa; curtain gas, 172 kPa; ion source gas 1 and ion source gas 2, both 275 kPa; source temperature, 450 °C; entrance potential, 10 V. The ionspray voltage was adjusted to 5.5 kV. Two MRM transitions for each substance were monitored for identification and quantification of the analytes. Parameters such as declustering potential, collision energy and cell exit potential were optimised in the auto-tuning program of the *Analyst* software. The retention times, the selected ion masses and the optimised parameters are listed in Table S3.

**Table S 3. Precursor, product ions and retention times used in LC tandem MS detection**

| substances                                            | retention time<br>[min] | precursor ion<br>[m/z] | product ion 1 (P1)<br>[m/z] | product ion 2 (P2)<br>[m/z] | DP<br>[V] | CE (P1/P2)<br>[eV] | CXP (P1/P2)<br>[V] |
|-------------------------------------------------------|-------------------------|------------------------|-----------------------------|-----------------------------|-----------|--------------------|--------------------|
| <b>Antiepileptics</b>                                 |                         |                        |                             |                             |           |                    |                    |
| Carbamazepine                                         | 15.35                   | 236.9                  | 193.9                       | 179.1                       | 71        | 27/49              | 16/12              |
| DHC                                                   | 15.45                   | 238.9                  | 196.0                       | 180.0                       | 66        | 31/55              | 14/14              |
| DHH                                                   | 12.10                   | 271.0                  | 252.9                       | 236.0                       | 41        | 13/19              | 16/ 6              |
| <b>Tranquilizers</b>                                  |                         |                        |                             |                             |           |                    |                    |
| Diazepam                                              | 17.80                   | 284.9                  | 221.9                       | 193.0                       | 76        | 45/34              | 14/20              |
| Oxazepam                                              | 15.60                   | 286.9                  | 103.9                       | 76.9                        | 61        | 47/81              | 8/ 6               |
| Temazepam                                             | 16.60                   | 301.0                  | 254.8                       | ---                         | 56        | 31                 | 18                 |
| <b>Opiates and opioids</b>                            |                         |                        |                             |                             |           |                    |                    |
| Morphine                                              | 5.20                    | 285.9                  | 201.0                       | 152.0                       | 86        | 35/77              | 6/14               |
| Codeine                                               | 10.75                   | 300.0                  | 215.0                       | 164.9                       | 71        | 37/53              | 16/12              |
| Dihydrocodeine                                        | 10.10                   | 302.1                  | 128.0                       | 200.9                       | 71        | 85/39              | 12/16              |
| Tramadol                                              | 14.40                   | 263.5                  | 58.0                        | ---                         | 46        | 45                 | 4                  |
| <b>Antibiotics</b>                                    |                         |                        |                             |                             |           |                    |                    |
| Sulfamethoxazole                                      | 13.75                   | 253.9                  | 155.8                       | 188.0                       | 66        | 23/21              | 12/14              |
| N <sup>4</sup> -Acetylsulfamethoxazole                | 13.90                   | 296.1                  | 134.0                       | 197.9                       | 81        | 35/25              | 12/14              |
| <b>Surrogate standards</b>                            |                         |                        |                             |                             |           |                    |                    |
| Carbamazepine <sup>13</sup> C <sup>15</sup> N         | 13.35                   | 239.0                  | 191.9                       | ---                         | 61        | 29                 | 12                 |
| Diazepam d <sub>5</sub>                               | 17.75                   | 290.0                  | 198.0                       | 261.9                       | 91        | 45/31              | 14/ 8              |
| Oxazepam d <sub>6</sub>                               | 15.60                   | 291.9                  | 235.9                       | 109.0                       | 81        | 31/49              | 20/ 8              |
| Benzoylcegonine d <sub>8</sub>                        | 11.00                   | 298.0                  | 171.0                       | 109.9                       | 66        | 29/43              | 14/ 8              |
| Morphine d <sub>6</sub>                               | 5.10                    | 292.0                  | 152.0                       | 159.9                       | 61        | 81/59              | 12/10              |
| Codeine d <sub>6</sub>                                | 10.70                   | 306.0                  | 165.0                       | 151.9                       | 91        | 57/89              | 12/12              |
| Sulfamethoxazole d <sub>4</sub>                       | 13.70                   | 257.9                  | 160.0                       | 192.0                       | 66        | 23/21              | 12/14              |
| N <sup>4</sup> -Acetylsulfamethoxazole d <sub>4</sub> | 13.90                   | 301.0                  | 202.7                       | 139.0                       | 81        | 27/37              | 18/16              |

DP = Declustering Potential

CE = Collision Energy

CXP = Cell Exit Potential

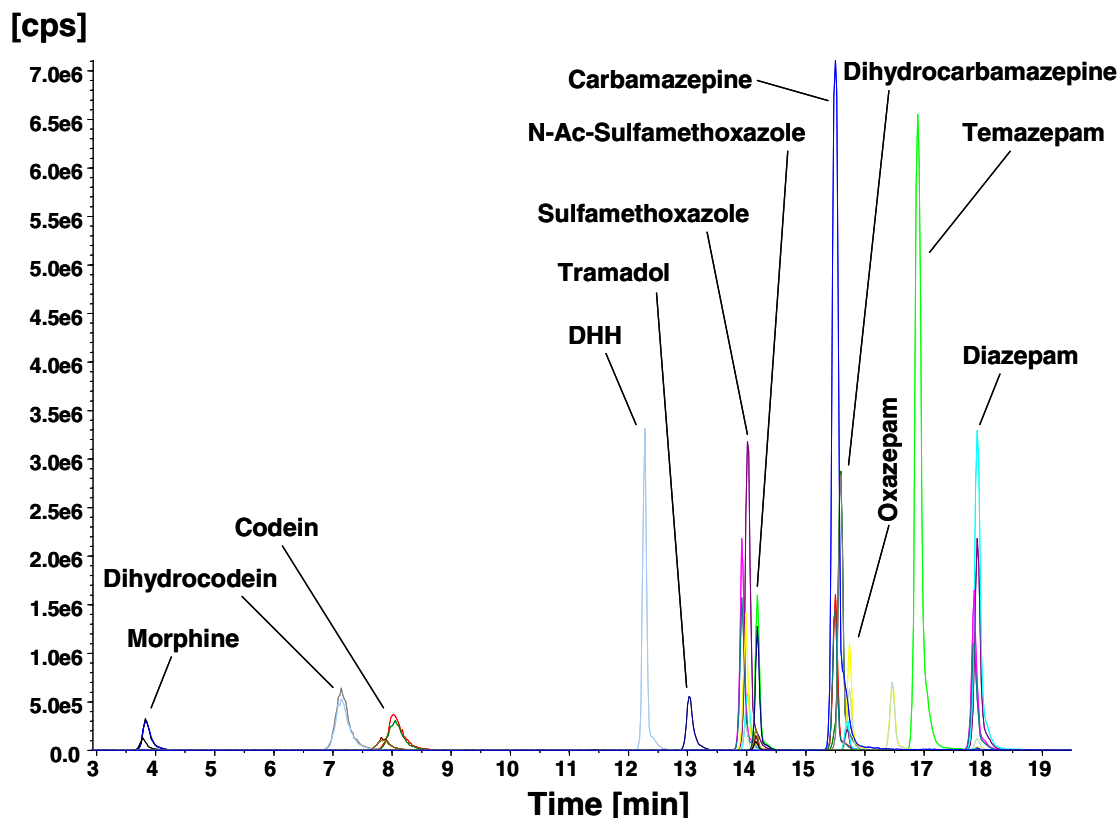

Figure S 2 Chromatogram of the analytes spiked with 200 ng to the reference sediment (rhine)

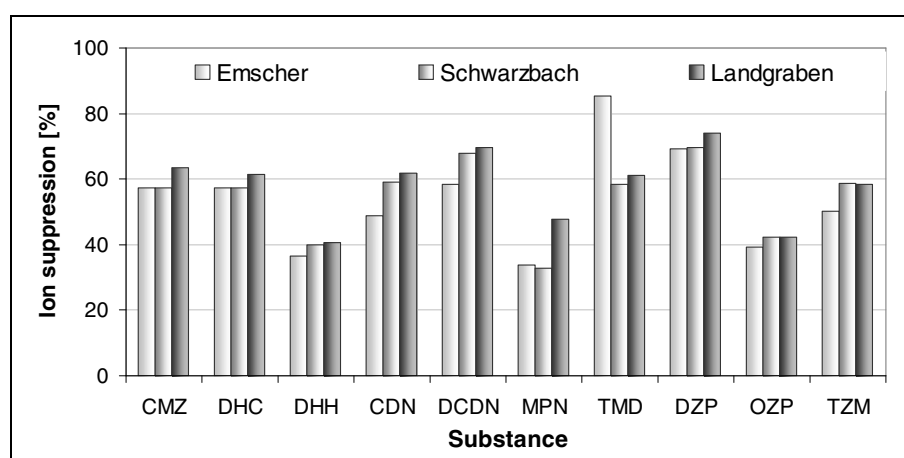

Figure S 3: Ion suppression in three different river sediments (CMZ – carbamazepine, DHC – dihydrocarbamazepine, DHH – dihydroxydihydrocarbamazepine, CDN – codeine, DCDN – dihydrocodeine, MPN – morphine, TMD – tramadol, DZP – diazepam, OZP – oxazepam, TZP – temazepam)

### 3.5 Calibration

External calibration curves with 11 calibration points ranging from 0.5 to 2000 ng/mL were prepared by spiking MilliQ water. The linearity range was between 1 and 200 ng/mL. A quadratic fitting ( $y = ax^2 + bx + c$ ) was used from 200 ng/mL to 2000 ng/mL (Table S4). In general, the correlation coefficients were higher than 0.993. Peak areas of the chromatograms were integrated and the ratios of the analyte/surrogate standards were calculated for each analyte. Resulting analyte concentrations were plotted versus the corresponding analyte peak areas or the respective ratios of analyte and surrogate standard peak areas.

**Table S 4. Quadratic calibration parameters**

| substances                             | Calibration equation                                             | $r^2$  |
|----------------------------------------|------------------------------------------------------------------|--------|
| <b>Antiepileptics</b>                  |                                                                  |        |
| Carbamazepine                          | $y = -5.73 \times 10^{-7} x^2 + 0.00466 x + 0.000737$            | 0.9993 |
| DHC                                    | $y = -1.45 \times 10^{-6} x^2 + 0.0101 x + 0.0019$               | 0.9993 |
| DHH                                    | $y = 1.6 \times 10^{-6} x^2 + 0.0025 x + 0.000241$               | 0.9932 |
| <b>Tranquilizers</b>                   |                                                                  |        |
| Diazepam                               | $y = -3.8 \times 10^{-7} x^2 + 0.00674 x + 0.00166$              | 0.9997 |
| Oxazepam                               | $y = -2.16 \times 10^{-6} x^2 + 0.0205 x + 0.00418$              | 0.9994 |
| Temazepam                              | $y = -2.39 \times 10^{-4} x^2 + 0.907 x + 0.189$                 | 0.9987 |
| <b>Opiates and opioids</b>             |                                                                  |        |
| Morphine                               | $y = 1.76 \times 10^{-6} x^2 + 0.0234 x + 0.0141$                | 0.9999 |
| Codeine                                | $y = -9.52 \times 10^{-7} x^2 + 0.0163 x + 1.49 \times 10^{-7}$  | 0.9997 |
| Dihydrocodeine                         | $y = -2.46 \times 10^{-6} x^2 + 0.0276 x + 0.000189$             | 0.9992 |
| Tramadol                               | $y = 7.46 \times 10^{-7} x^2 + 0.00423 x + 0.000346$             | 0.9988 |
| <b>Antibiotics</b>                     |                                                                  |        |
| Sulfamethoxazole                       | $y = -1.91 \times 10^{-7} x^2 + 0.00227 x - 5.48 \times 10^{-9}$ | 0.9994 |
| N <sup>4</sup> -Acetylsulfamethoxazole | $y = -1.11 \times 10^{-5} x^2 + 0.0637 x + 0.0836$               | 0.9997 |

## 4 Environmental relevance

It was found that the sorbed fractions of carbamazepine and sulfamethoxazole are negligible compared to the dissolved fractions. However, the question arises whether these relative low sediment contamination levels are causing adverse effects for benthic organisms. Using the NOEC < 140 ng/g based on the reduced emerging rate found with *Chironomus riparius* (insect larvae) by Oetgen et al. (2) and the highest concentration in sediments of 49 ng/g found in this study, a MEC/PNEC of 17 is attained with an assessment factor of 50 (3). This ratio indicates a relatively high risk that adverse effects are caused by the presence of carbamazepine in sediments. For sulfamethoxazole effects at those low concentration levels are not described for sediment tests (3, 4). For most of the selected psycho-active drugs, even results of basic ecotoxicological test are currently not described in literature. The low sediment/water distribution coefficients ( $K_{OC} = 25\text{--}55.9$  L/kg) of DHH and its elevated biodegradation (DT<sub>50</sub>: 8d) in water-sediment-systems in comparison to carbamazepine ( $K_{OC} = 175,5\text{--}238,3$  L/kg; DT<sub>50</sub>: 328d (4)) might be the main reason that DHH was not found in sediments, although it was present at similar concentrations as carbamazepine in treated wastewater and river water (1,5). The  $K_d/K_{oc}$  values of sulfamethoxazole were comparable to DHH, but this antibiotic was detected in natural sediments at a few ng/g. The lack of biodegradation of sulfamethoxazole or better desorption of DHH may explain the presence of sulfamethoxazole and the absence of DHH in the natural sediments. Nevertheless, it is known that sulfamethoxazole can leach through soils without being significantly sorbed or degraded (6-8).

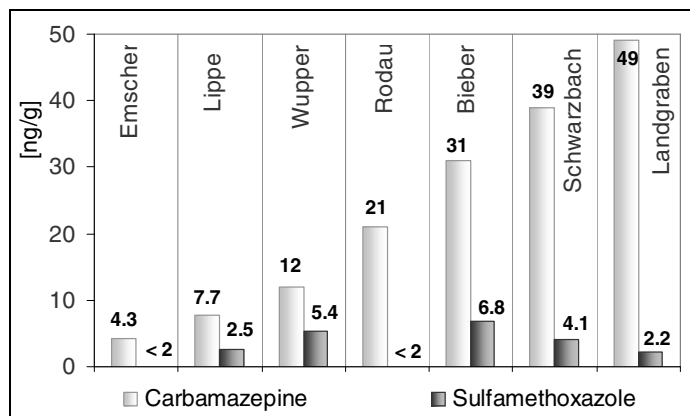

**Figure S 4. Concentrations of carbamazepine and sulfamethoxazole in natural river sediments**

## 5 Sorption kinetics

Since preliminary studies revealed that there might be losses of substances due to ageing or (bio)degradation (10,11), a total mass balance was calculated to assure that the data was not significantly influenced by those processes. For the sorption experiments, the sum of substance quantity detected in the sediment and the water phase was compared with the quantity spiked into the aqueous phase. For the desorption experiments, the sum of sorbed and dissolved quantities was compared with substance residues measured in the wet sediment after 24h of incubation. The solid-to-liquid ratios were 1/1 for CMZ, DHC, and DHH; 1/5 for DZP, OZP, TZP, CDN, DCDN, and TMD; and 1/3 for MPN on the Burgen sediment; and 1/25 for CMZ, DHC, DZP, OZP, TZP, and CDN; 1/10 for DHH, DCDN, and TMD; and 1/5 for MPN on the Dausenau sediment. Sediment masses between 1 and 10 g ( $\pm 0.01$  g) and solution volumes (0.01 mol/L  $\text{CaCl}_2$ ) between 10 to 50 mL ( $\pm 0.05$  mL) were used. Enclosed is the mass balance after 24h (Table S5) and the adsorption kinetics (Fig. S5-Fig. S14) of the target compounds in two different sediments with (right) and without (left) addition of sodium azide are shown.

**Table S 5. Total mass balance in % (w/w) of the test substances for the sorption and desorption test period in both sediments after 24h <sup>a</sup>**

| Substance                              | Total mass balance in % |              |                   |              |
|----------------------------------------|-------------------------|--------------|-------------------|--------------|
|                                        | Burgen sediment         |              | Dausenau sediment |              |
|                                        | Sorption                | Desorption   | Sorption          | Desorption   |
| Carbamazepine                          | 93 $\pm$ 8              | 97 $\pm$ 8   | 105 $\pm$ 6       | 95 $\pm$ 22  |
| DHC                                    | 93 $\pm$ 6              | 97 $\pm$ 6   | 103 $\pm$ 17      | 90 $\pm$ 21  |
| DHH                                    | 106 $\pm$ 24            | 90 $\pm$ 21  | 133 $\pm$ 25      | 76 $\pm$ 19  |
| Codeine                                | 83 $\pm$ 4              | 126 $\pm$ 26 | 95 $\pm$ 11       | 84 $\pm$ 10  |
| Dihydrocodeine                         | 82 $\pm$ 8              | 144 $\pm$ 19 | 78 $\pm$ 10       | 112 $\pm$ 30 |
| Tramadol                               | 77 $\pm$ 11             | 108 $\pm$ 15 | 67 $\pm$ 10       | 129 $\pm$ 25 |
| Diazepam                               | 94 $\pm$ 9              | 139 $\pm$ 35 | 100 $\pm$ 8       | 102 $\pm$ 21 |
| Oxazepam                               | 93 $\pm$ 10             | 134 $\pm$ 22 | 106 $\pm$ 9       | 92 $\pm$ 27  |
| Temazepam                              | 86 $\pm$ 19             | 94 $\pm$ 44  | 96 $\pm$ 9        | 61 $\pm$ 12  |
| Sulfamethoxazole                       | 79 $\pm$ 10             | 55 $\pm$ 30  | 94 $\pm$ 11       | 58 $\pm$ 24  |
| N <sup>4</sup> -Acetylsulfamethoxazole | 102 $\pm$ 8             | 104 $\pm$ 3  | 106 $\pm$ 4       | 84 $\pm$ 5   |

<sup>a</sup>: values reported as mean  $\pm$  confidence interval (N=5, P=95%)



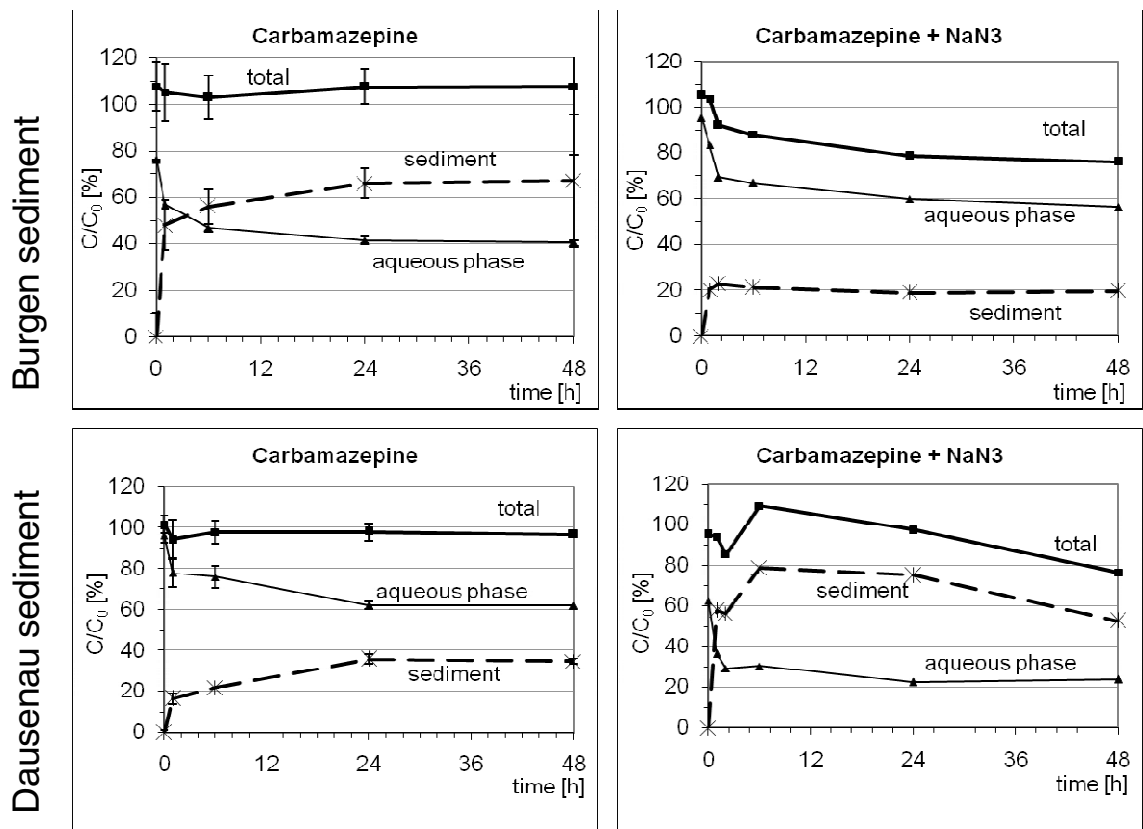

Figure S 5. Adsorption kinetics of carbamazepine in different sediments with (right) and without (left) addition of sodium azide

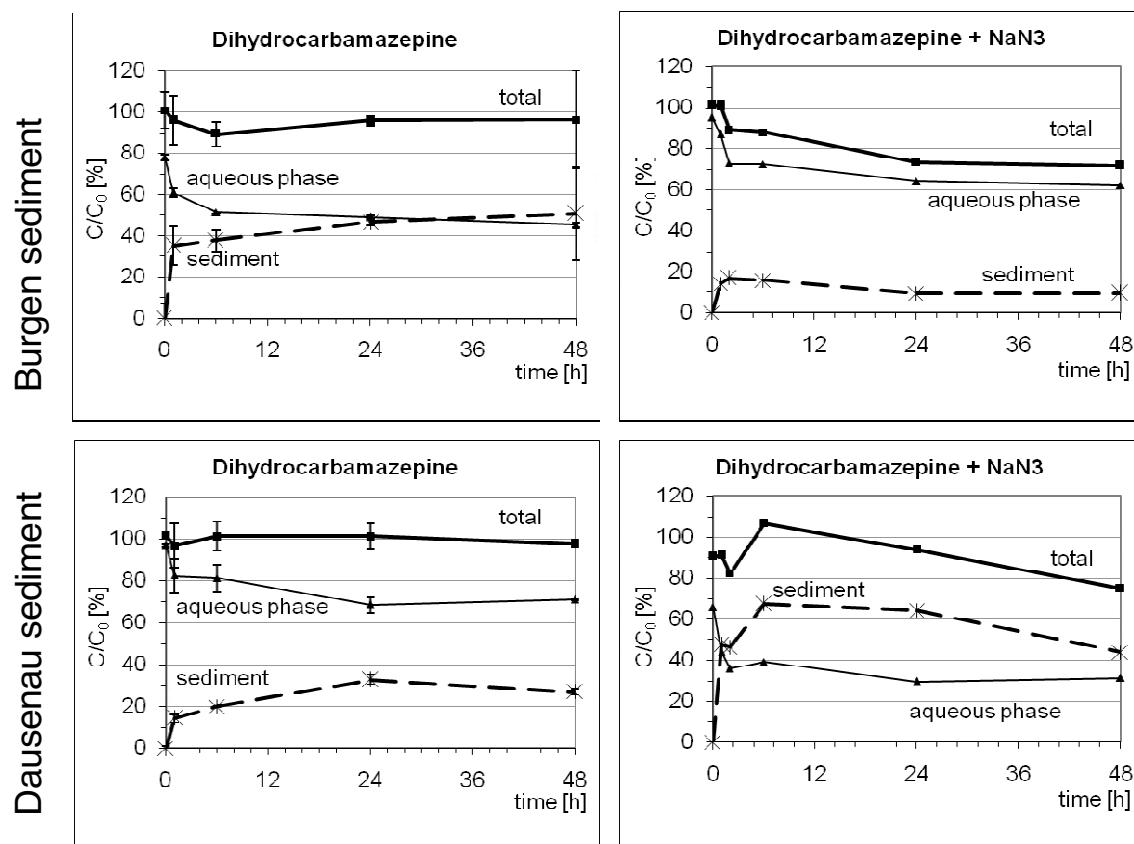

Figure S 6. Adsorption kinetics of dihydrocarbamazepine in different sediments with (right) and without (left) addition of sodium azide

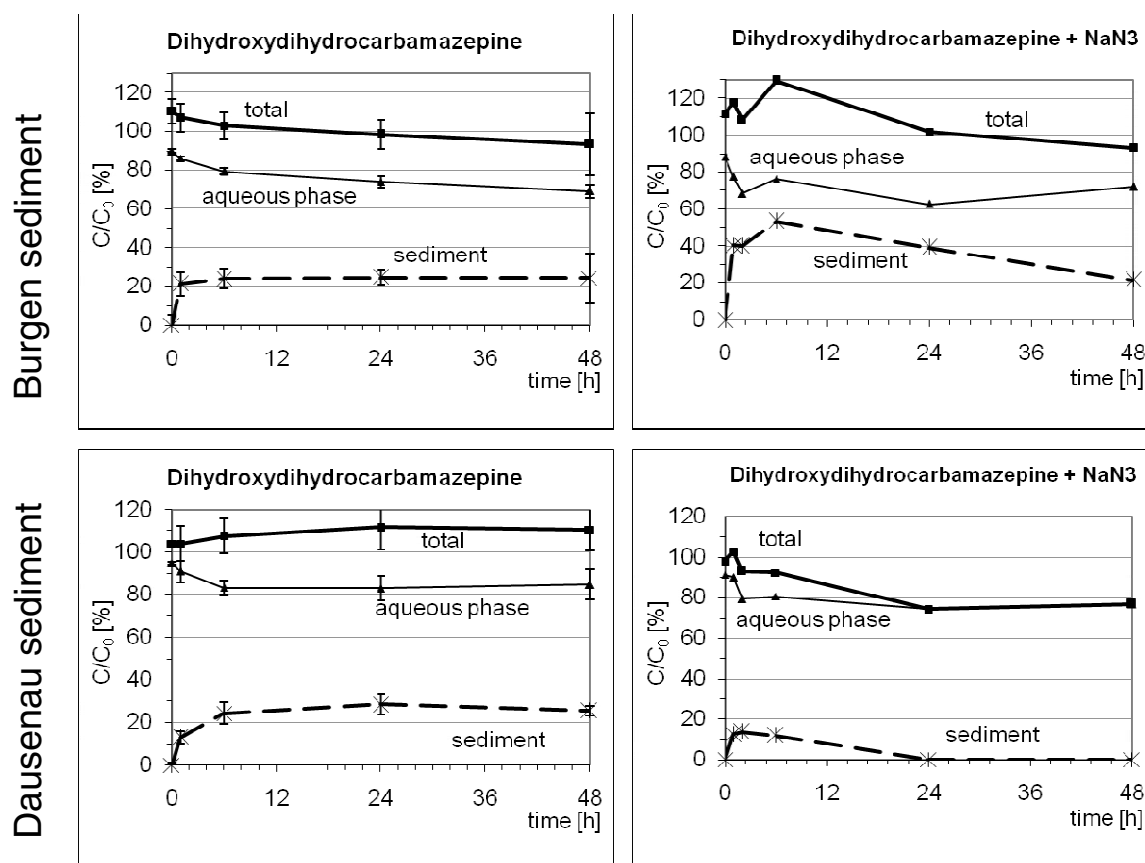

Figure S 7. Adsorption kinetics of dihydroxydihydrocarbamazepine in different sediments with (right) and without (left) addition of sodium azide

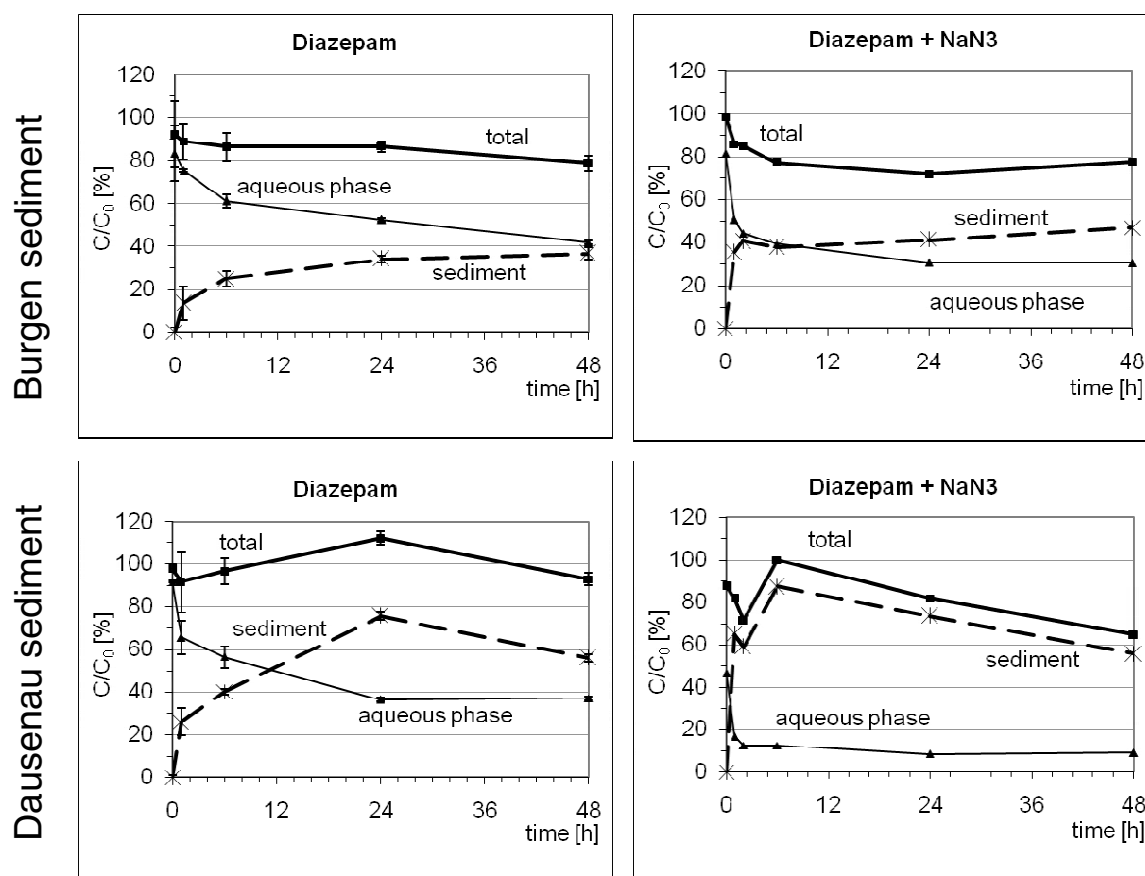

Figure S 8. Adsorption kinetics of diazepam in different sediments with (right) and without (left) addition of sodium azide

Burgen sediment

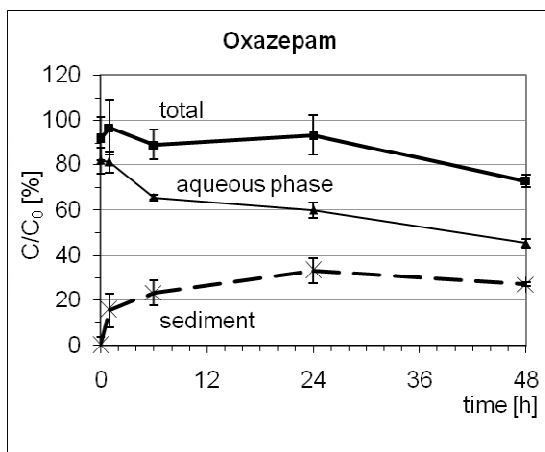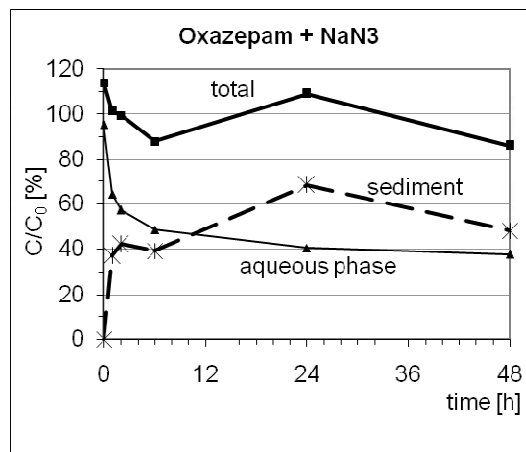

Dausenau sediment

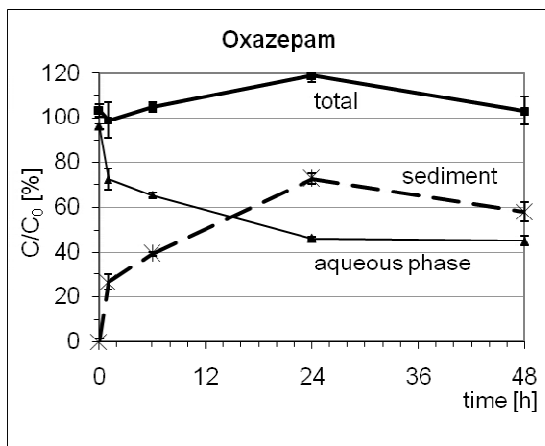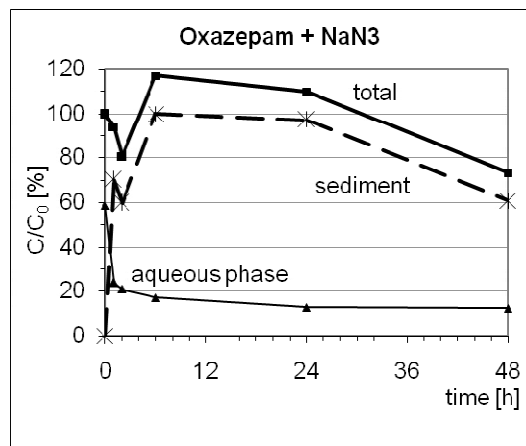

Figure S 9. Adsorption kinetics of oxazepam in different sediments with (right) and without (left) addition of sodium azide

Burgen sediment

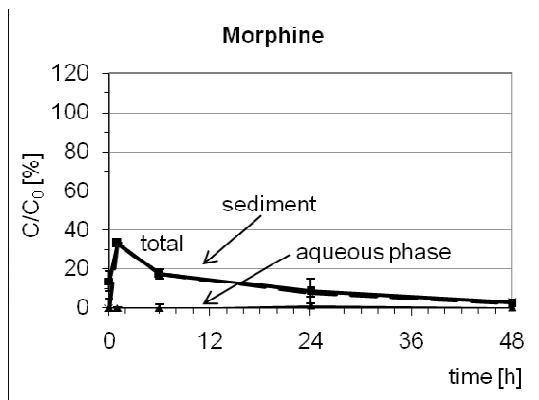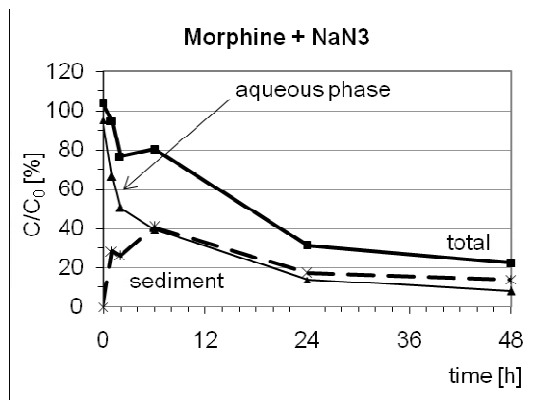

Dausenau sediment

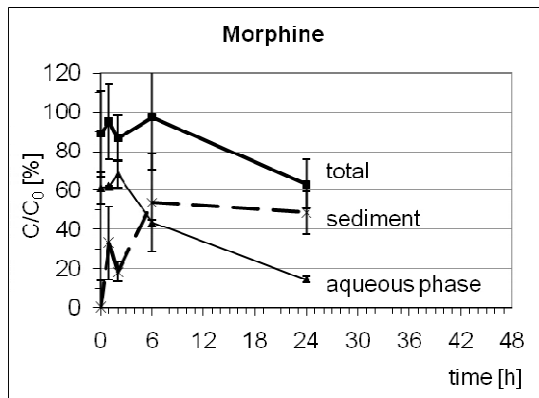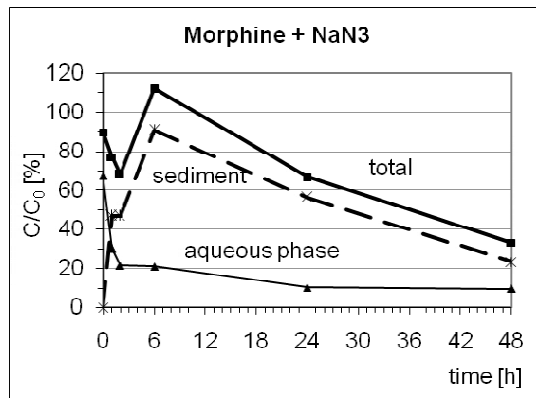

Figure S 10. Adsorption kinetics of morphine in different sediments with (right) and without (left) addition of sodium azide

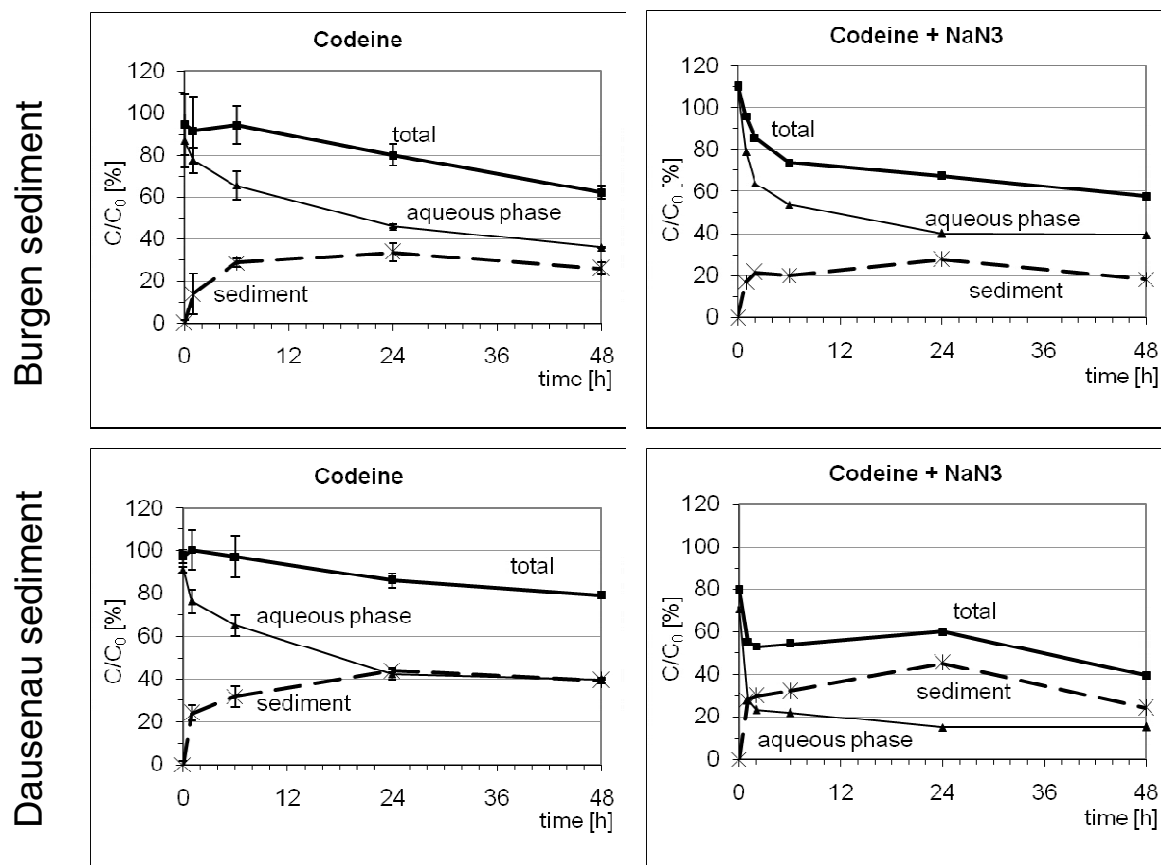

Figure S 11. Adsorption kinetics of codeine in different sediments with (right) and without (left) addition of sodium azide

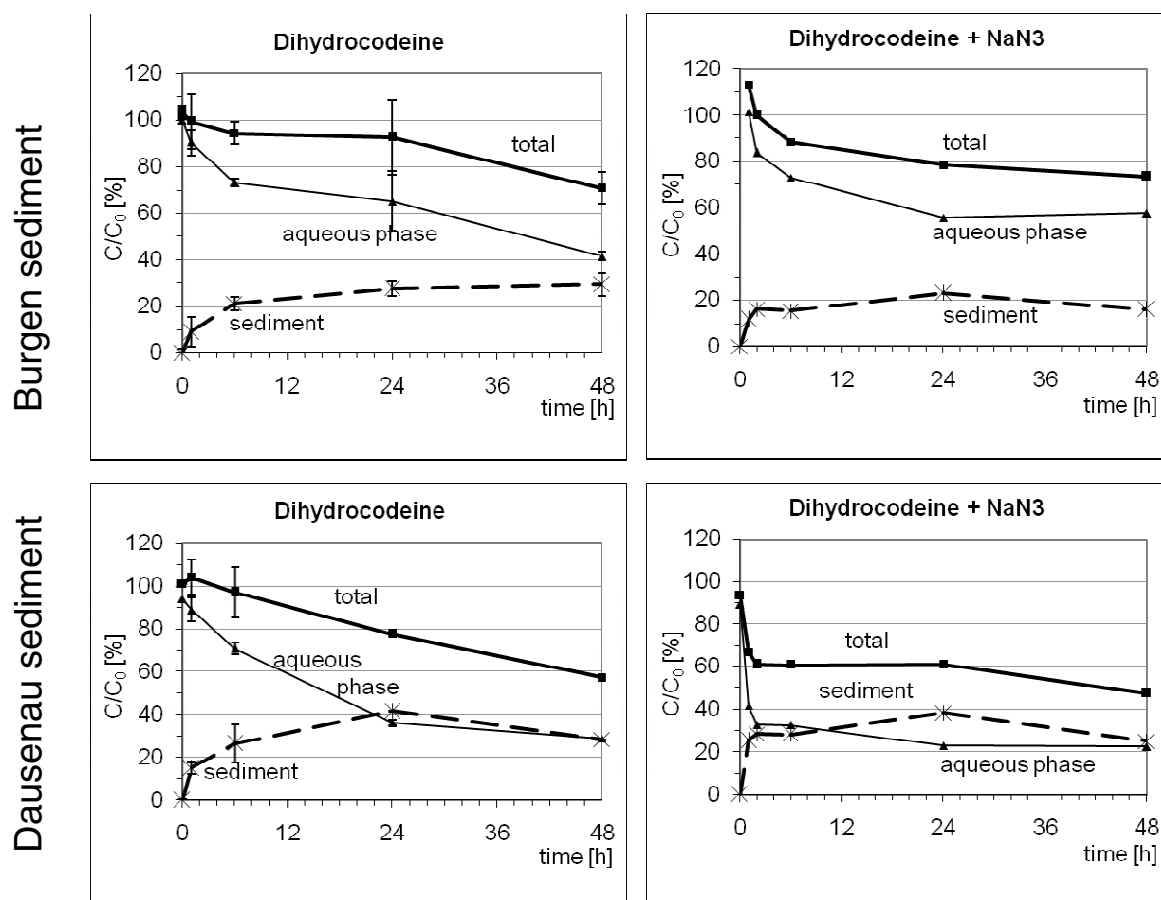

Figure S 12. Adsorption kinetics of codeine in different sediments with (right) and without (left) addition of sodium azide

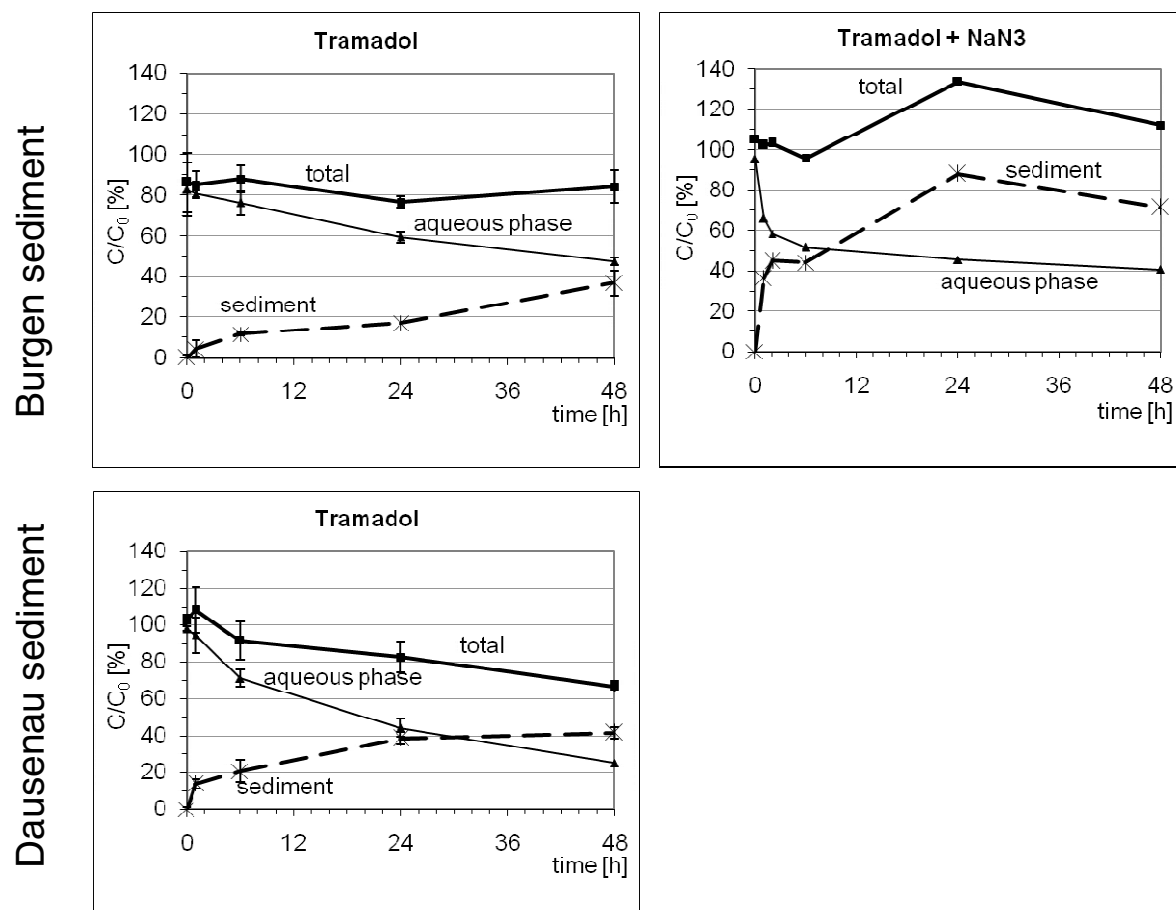

Figure S 13. Adsorption kinetics of tramadol in different sediments with (right) and without (left) addition of sodium azide

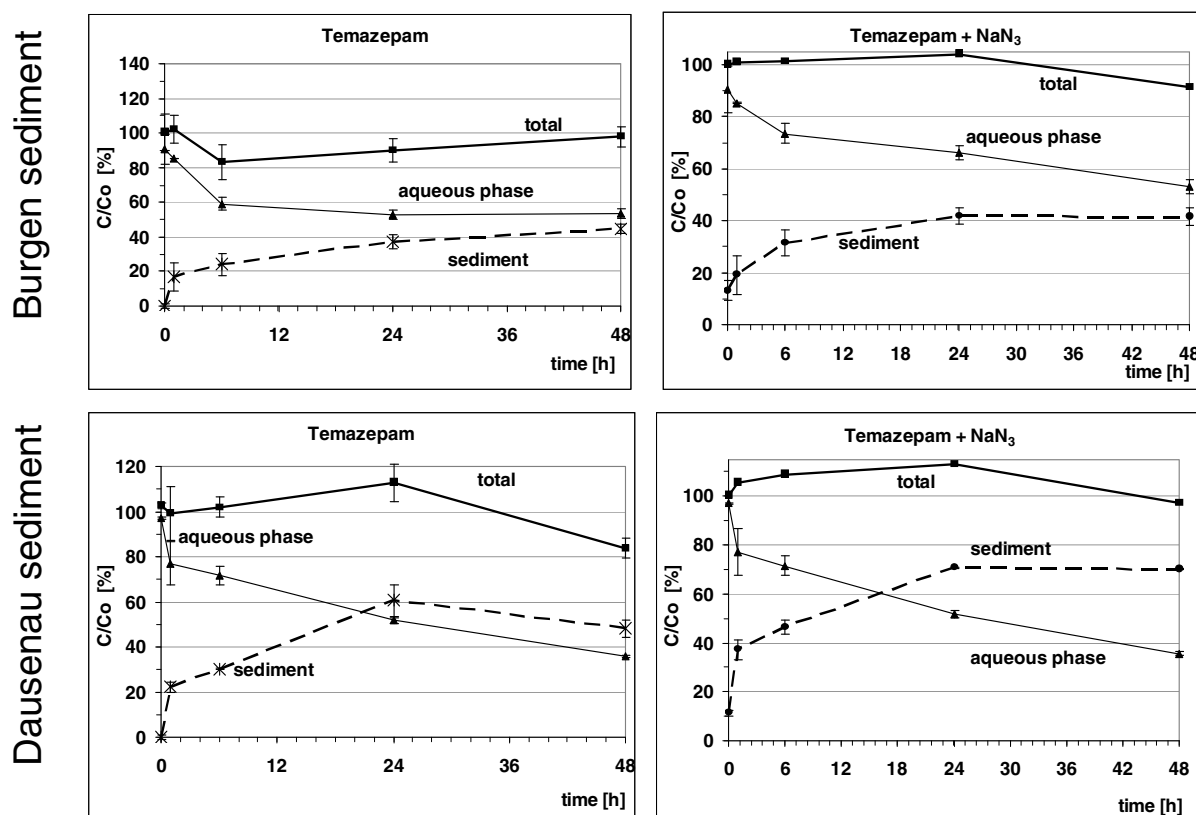

Figure S 14. Adsorption kinetics of temazepam in different sediments with (right) and without (left) addition of sodium azide

**Table S 6. Calculated thermodynamic indices of irreversibility, TII for sorption-desorption data on Burgen and Dausenau sediments.** The TII is zero for reversible sorption and approaches 1 for completely irreversible systems.

| Compound                   | Concentration<br>[ng/mL] | Tii    |          |
|----------------------------|--------------------------|--------|----------|
|                            |                          | Burgen | Dausenau |
| Carbamazepine              | 25                       | -0.301 | 0.762    |
|                            | 50                       | 0.253  | 0.841    |
|                            | 250                      | -0.137 | 0.902    |
|                            | 500                      | 0.261  | 0.917    |
|                            | 2500                     | -0.286 | 0.678    |
| 10,11-Dihydrocarbamazepine | 25                       | -0.211 | 0.243    |
|                            | 50                       | 0.223  | 0.304    |
|                            | 250                      | -0.167 | 0.365    |
|                            | 500                      | 0.285  | 0.341    |
|                            | 2500                     | -0.316 | 0.044    |
| Diazepam                   | 25                       | 1.001  | 0.763    |
|                            | 50                       | 0.809  | 0.826    |
|                            | 250                      | 1.021  | 0.940    |
|                            | 500                      | 0.917  | 0.938    |
|                            | 2500                     | 0.518  | 0.662    |
| Oxazepam                   | 25                       | 0.843  | 0.489    |
|                            | 50                       | 0.667  | 0.626    |
|                            | 250                      | 1.002  | 0.756    |
|                            | 500                      | 0.983  | 0.890    |
|                            | 2500                     | 0.480  | 0.658    |
| Codeine                    | 25                       | 0.835  | 0.738    |
|                            | 50                       | 0.828  | 0.720    |
|                            | 250                      | 0.601  | 0.438    |
|                            | 500                      | 0.757  | 0.652    |
|                            | 2500                     | 0.626  | 0.631    |
| Dihydrocodeine             | 25                       | 0.932  | 0.894    |
|                            | 50                       | 0.869  | 0.586    |
|                            | 250                      | 1.003  | 0.551    |
|                            | 500                      | 0.847  | 0.998    |
|                            | 2500                     | 1.038  | 0.822    |
| Temazepam                  | 25                       | 0.847  | 0.518    |
|                            | 50                       | 0.272  | 0.614    |
|                            | 250                      | 0.763  | 0.629    |
|                            | 500                      | 0.812  | 0.447    |
|                            | 2500                     | 0.173  | -0.194   |
| Tramadol                   | 25                       | 0.181  | 1.245    |
|                            | 50                       | -0.077 | 0.903    |
|                            | 250                      | 0.492  | 1.193    |
|                            | 500                      | 0.492  | 1.158    |
|                            | 2500                     | 0.436  | 0.510    |

## Literature cited

- (1) Hummel, D.; Löffler, D.; Fink, G.; Ternes, T. A., Simultaneous determination of psychoactive drugs and their metabolites in aqueous matrices by liquid chromatography mass spectrometry. *Environ. Sci. Technol.* **2006**, 40, 7321-7328.
- (2) Oetken, M.; Nentwig, G.; Löffler, D.; Ternes, T.; Oehlmann, J. Effects of pharmaceuticals on aquatic invertebrates. Part I. The antiepileptic drug carbamazepine. *Arch. Environ. Cont. Toxic.* **2005**, 49, 353-361.
- (3) European Union Technical Guidance Document on Risk Assessment in support of Commission Directive 93/67/EEC on Risk Assessment for New Notified Substances, Commission Regulation (EC) No 1488/94 on Risk Assessment for Existing Substances, and Directive 98/8/EC of the European Parliament and of the Council concerning the placing of biocidal products on the market, Parts I, II and IV. *European Communities* **2003**, EUR 20418 EN/20411.
- (4) Liebig, M.; Moltmann, J. F.; Knacker, T. Evaluation of Measured and Predicted Environmental Concentrations of Selected Human Pharmaceuticals and Personal Care Products. *Environ. Sci. Pollut. Res.* **2006**, 13, 110-119.
- (5) Löffler, D.; Römbke, J.; Meller, M.; Ternes, T. Environmental fate of pharmaceuticals in water/sediment systems. *Environ. Sci. Technol.* **2005**, 39, 5209-5218.
- (6) Miao, X. S.; Metcalfe, C. D. Determination of carbamazepine and its metabolites in aqueous samples using liquid chromatography-electrospray tandem mass spectrometry. *Anal. Chem.* **2003**, 75, 3731-3738
- (7) Hoeltge, S.; Kreuzig, R. Laboratory testing of sulfamethoxazole and its metabolite acetyl-sulfamethoxazole in soil. *Clean-Soil Air Water* **2007**, 35, 104-110.
- (8) Ternes, T. A.; Bonerz, M.; Herrmann, N.; Teiser, B.; Andersen, H. R. Irrigation of treated wastewater in Braunschweig, Germany: An option to remove pharmaceuticals and musk fragrances. *Chemosphere* **2007**, 66, 894-904.
- (9) Cordy, G. E.; Duran, N. L.; Bouwer, H.; Rice, R. C.; Furlong, E. T.; Zaugg, S. D.; Meyer, M. T.; Barber, L. B.; Kolpin, D. W. Do pharmaceuticals, pathogens, and other organic waste water compounds persist when waste water is used for recharge? *Ground Water Monitoring and Remediation* **2004**, 24, 58-69.
- (10) Bialk, H. M., J. A. Pedersen, NMR investigation of enzymatic coupling of sulfonamide antimicrobials with humic substances. *Environ. Sci. Technol.* **2008**, 42, 106-112.
- (11) Ingerslev, F., B. Halling-Sorensen, Biodegradability properties of sulfonamides in activated sludge. *Environ. Toxicol. Chem.* **2000**, 19, 2467-2473.
